# Supplementary material for: Dysregulated lncRNA TUG1 in different pulmonary artery cells under hypoxia
Source: PubMed Central journal article supplement — Ann Transl Med. 2021 May;9(10):879. doi: 10.21037/atm-21-2040 (PMC8184498; doi:10.21037/atm-21-2040), 2021-05
Supplement: atm-09-10-879-dss.pdf [file atm-09-10-879-dss.pdf]

## Data Sharing Statement

|                     |                                                                                                                                                     |                                                                                                                                    |
|---------------------|-----------------------------------------------------------------------------------------------------------------------------------------------------|------------------------------------------------------------------------------------------------------------------------------------|
| <b>Article Info</b> | <a href="http://dx.doi.org/10.21037/atm-21-2040">http://dx.doi.org/10.21037/atm-21-2040</a>                                                         |                                                                                                                                    |
| <b>Item</b>         | <b>Question</b>                                                                                                                                     | <b>Authors' Response<br/>(place "-" if not applicable)</b>                                                                         |
| 1                   | Would you like to share data collected for your study to others?                                                                                    | Yes, we agree to upload the experimental original data, but the human genetic raw data detected by sequencing may not be uploaded. |
| 2                   | If not, would you like to share the reason for your decision?                                                                                       | Because China's latest law does not allow the uploading of raw data related to human genetic information if it is against the law  |
| 3                   | What data in particular will be shared?                                                                                                             | The experimental original data detected by PCR.                                                                                    |
| 4                   | Any other documents will be shared? Such as study protocol, statistical analysis plan, informed consent form, clinical study report, analytic code. | Yes                                                                                                                                |
| 5                   | When will data availability begin?                                                                                                                  | From the publication date.                                                                                                         |
| 6                   | When will data availability end?                                                                                                                    | Two years within the publication date, since the technique or survival date may be updated over time.                              |
| 7                   | To whom will you share the data?                                                                                                                    | Medical expert and surgeons who are interested in studies of PH.                                                                   |
| 8                   | For what type of analysis or purpose?                                                                                                               | To study the pathogenesis of HPH.                                                                                                  |
| 9                   | How or where can the data/documents be obtained?                                                                                                    | Emails could be sent to the address below to obtain the shared data.                                                               |
| 10                  | Any other restrictions?                                                                                                                             | No                                                                                                                                 |
